# Supplementary material for: Enhanced Ammonia Adsorption on Directly Deposited Nanofibrous Carbon Films
Source: Hindawi journal article supplement (doi:10.1155/2018/7497619), 2018-09-17
Supplement: f1 [file 7497619.f1.doc]

**Supplementary material**

**Enhanced ammonia adsorption on** **directly deposited nanofibrous carbon films**

Alexander G. Bannova, e *, Ondřej Jašekb, Jan Prášekc, d, Jiří Buršíkf, Lenka Zajíčkováa, b

a Central European Institute of Technology, Masaryk University, Kamenice 5, CZ‑62500 Brno, Czech Republic

b Department of Physical Electronics, Faculty of Science, Masaryk University, Kotlářská 2, CZ‑61137 Brno, Czech Republic

c Central European Institute of Technology, Brno University of Technology, Technická 3058/10, CZ‑61600 Brno, Czech Republic

d Centre of Sensors, Information and Communication Systems, Faculty of Electrical Engineering and Communication, Technická 3058/10, CZ‑61600 Brno, Czech Republic

e Department of Chemistry and Chemical Technology, Novosibirsk State Technical University, K. Marx 20, 630073 Novosibirsk, Russian Federation

f Institute of Physics of Materials, Academy of Sciences of the Czech Republic, Žižkova 22, CZ‑61662 Brno, Czech Republic

Selective area diffraction (SAD) patterns show the predominant presence of γ-Fe2O3 phase among the nanoparticles (Fig. S1).


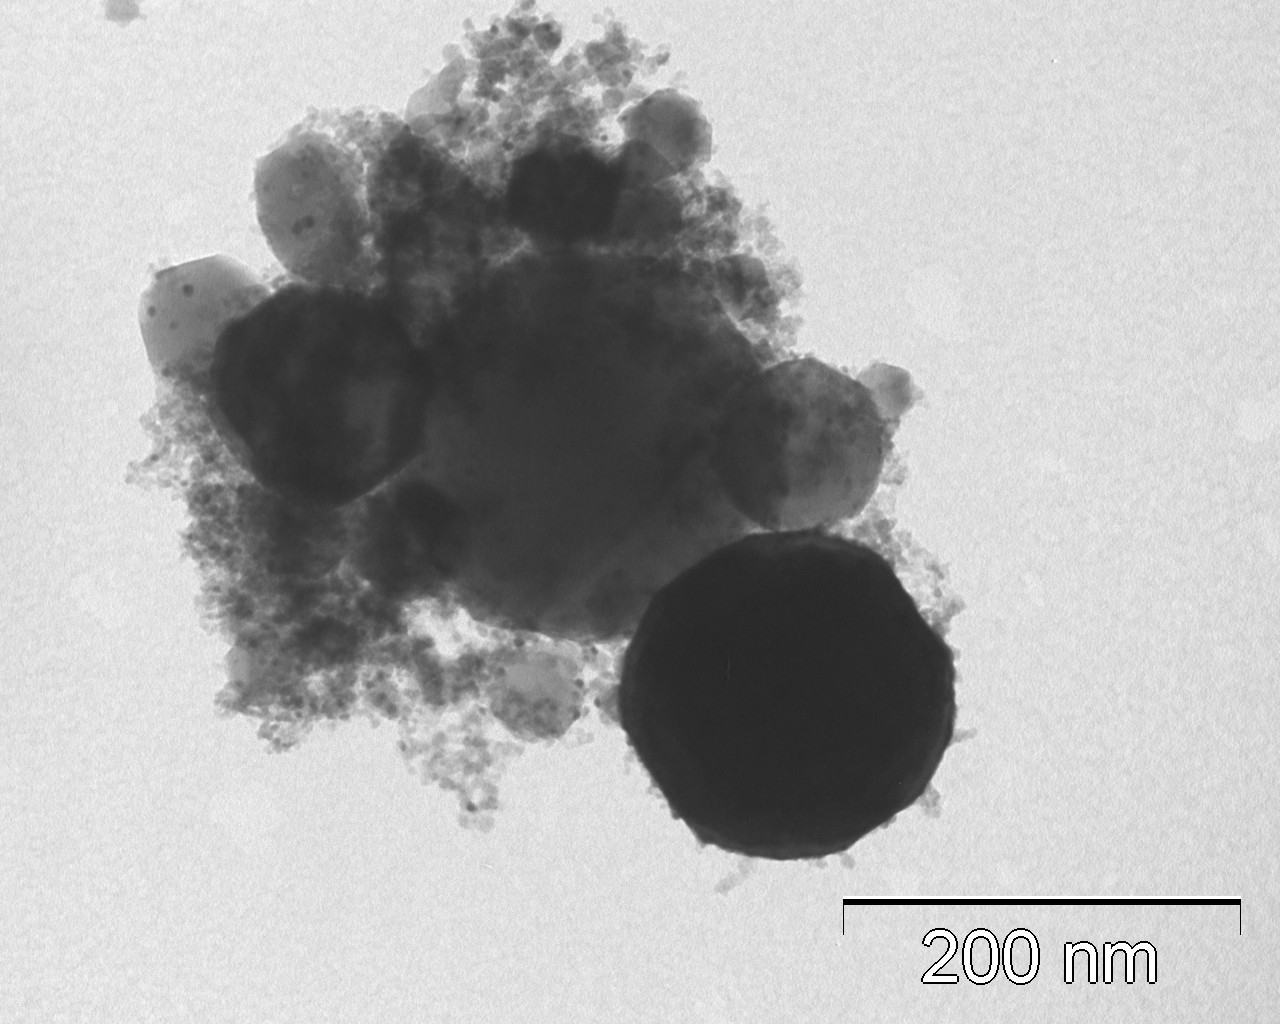

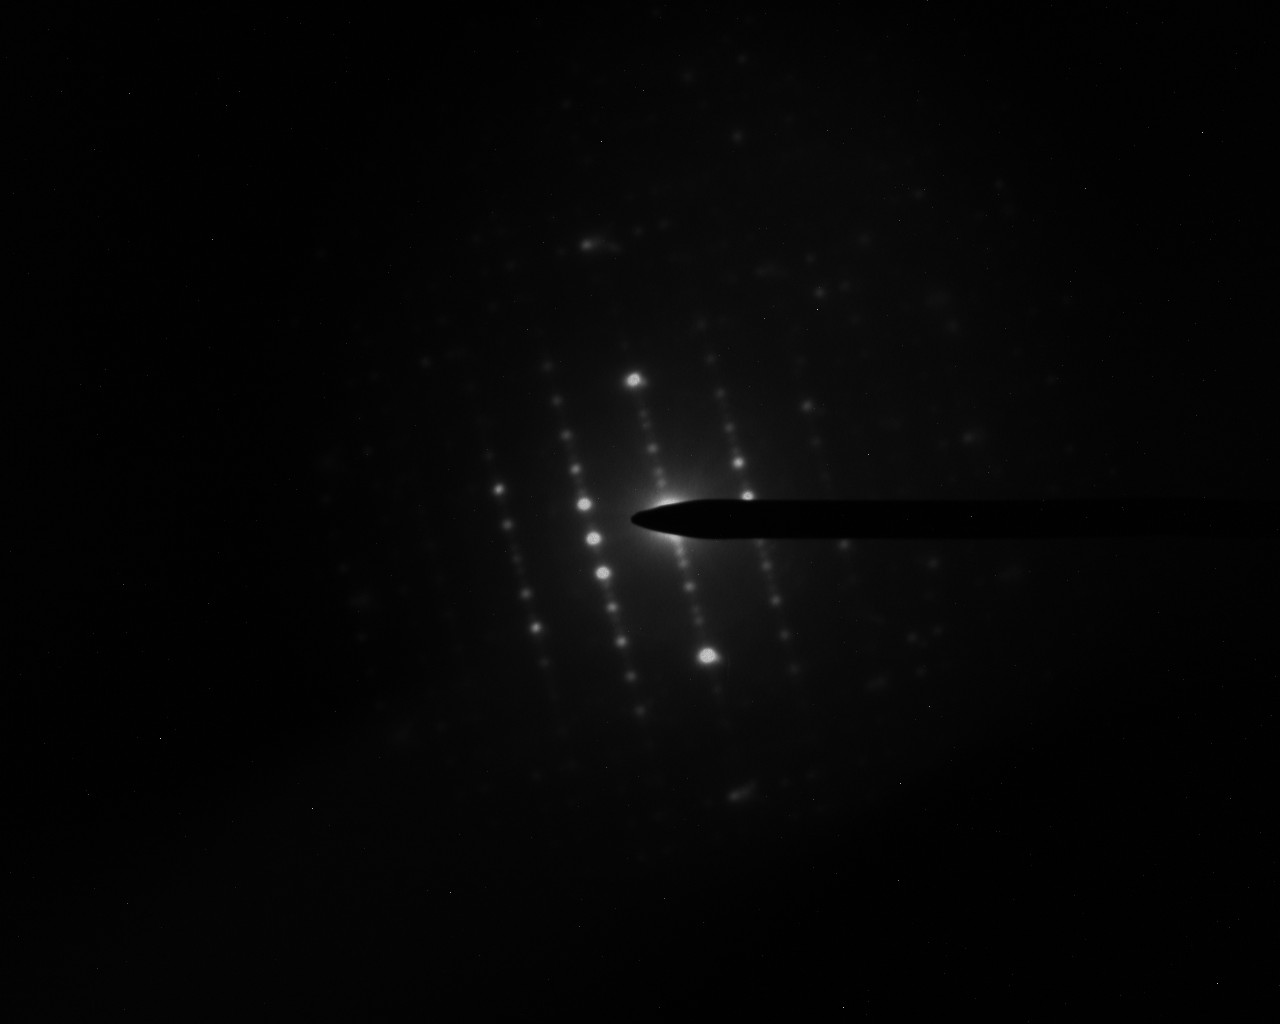

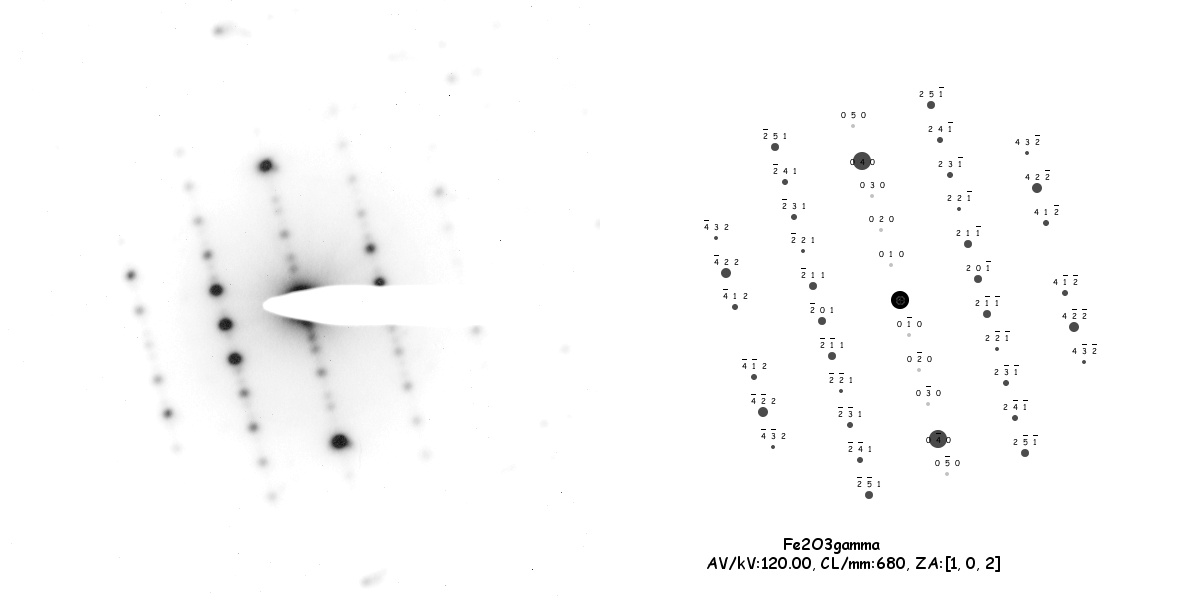


**Fig. S1 –** SAD patterns of catalyst used for nanofibrous carbon (NFC) synthesis

SEM micrographs of all the NFC samples prepared at different temperatures and deposition times are compared in Fig. S2.


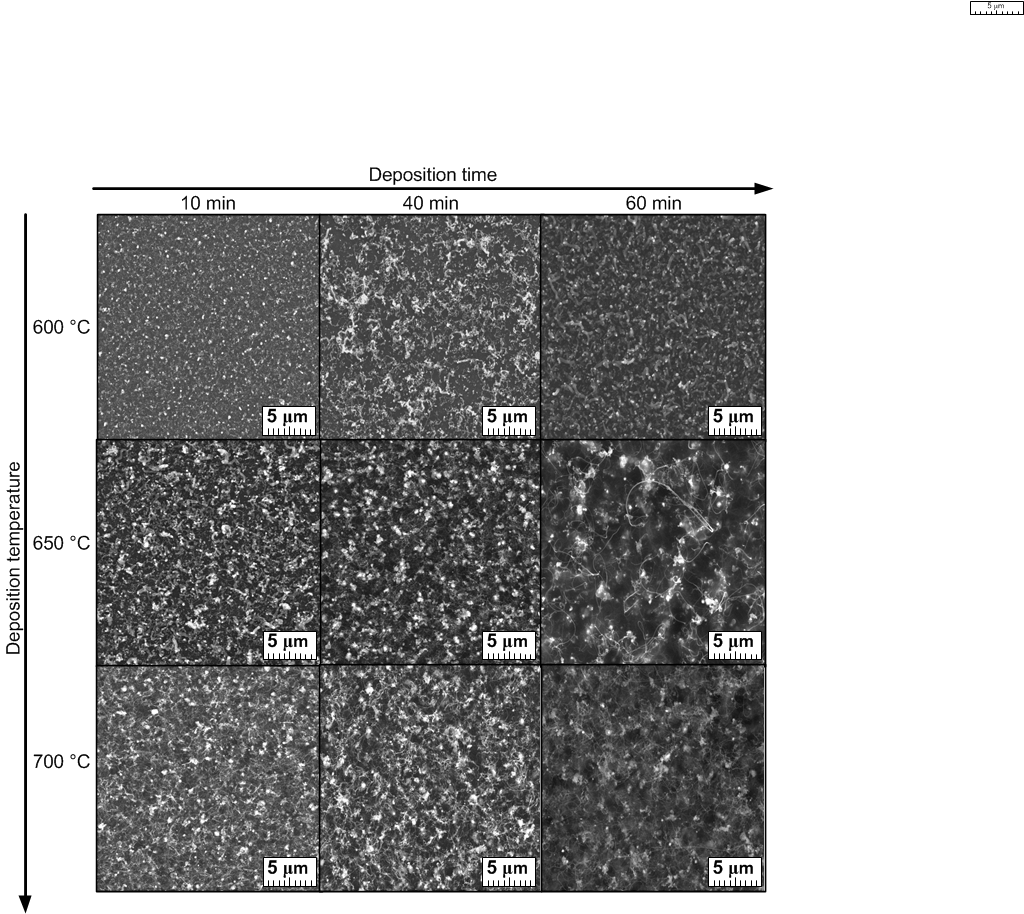


a

b

c

d

e

f

g

h

i

**Fig. S2** – SEM images of NFCs synthesized with different temperatures and deposition time:

a – CNF600-10, b – CNF600-40, c – CNF600-60, d – CNF650-10, e – CNF650-40, f – CNF650-60, g – CNF700-10, h – CNF700-40, i – CNF700-60

The stepwise increase of the ammonia concentration without the recovery phase was also tested and an example is given for the CNT600-40 sample in Fig. S3. In this case, the sensors exhibited higher response than in the measurements with recovery phase.

**Fig. S3 –** CNF600-40 response curve during stepwise increase of the NH3 concentration in the range of 10-500 ppm
